# Supplementary material for: Tuning the arrangement of atoms in SAPO-34 molecular sieves for a deeper understanding of their performance in the MTO reaction
Source: Royal Society of Chemistry journal article supplement (doi:10.1039/d5cy01271f), 2026-01-01
Supplement: d5cy01271f1.pdf [file d5cy01271f1.pdf]

**Supporting Information: Tuning the arrangement of atoms in SAPO-34 molecular sieves for a deeper understanding of their performance in MTO reaction**

Ludovica Pace<sup>a</sup>, Junwei Wu<sup>a</sup>, Marco Giuseppe Geloso<sup>a</sup>, Francesco Dalena<sup>a</sup>, Diogenes Honorato-Piva<sup>a</sup>, Eddy Dib<sup>b\*</sup>, Svetlana Mintova<sup>a\*</sup>

a Université de Caen Normandie, ENSICAEN, CNRS, LCS, Laboratoire Catalyse et Spectrochimie, 14000 Caen, France

b CEMHTI, CNRS, University of Orléans, 1D avenue de la Recherche Scientifique, 45071, Orléans, France

<sup>13</sup>C and <sup>31</sup>P MAS NMR spectroscopy

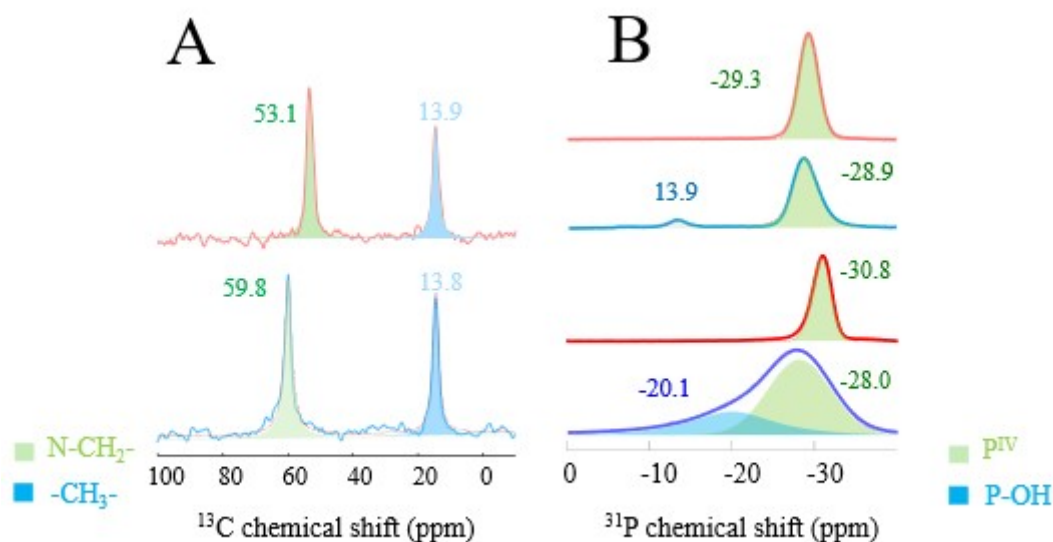

Fig. S1 (A) Solid-state <sup>13</sup>C MAS NMR spectra of N-AS (top, light red) and P-AS (bottom, light blue); (B) Solid-state <sup>31</sup>P MAS NMR spectra of N-AS (light red) and P-AS (light blue), N-C (red) and P-C (blue).

**Table S1** <sup>13</sup>C and <sup>31</sup>P relative percentage of N-AS, P-AS, N-C and P-C.

| Sample | N-CH <sub>2</sub> - | CH <sub>3</sub> - | P <sup>IV</sup> | P-OH |
|--------|---------------------|-------------------|-----------------|------|
| N-AS   | 62                  | 38                | 97              | 3    |
| P-AS   | 53                  | 47                | 92              | 8    |
| N-C    | -                   | -                 | 100             | -    |
| P-C    | -                   | -                 | 55              | 45   |

## N<sub>2</sub> adsorption-desorption isotherms

The pore size distribution of N-C and P-C analysed using nitrogen sorption and evaluated through the Non-Local Density Functional Theory (NLDFT) model is shown in **Figure S1**.

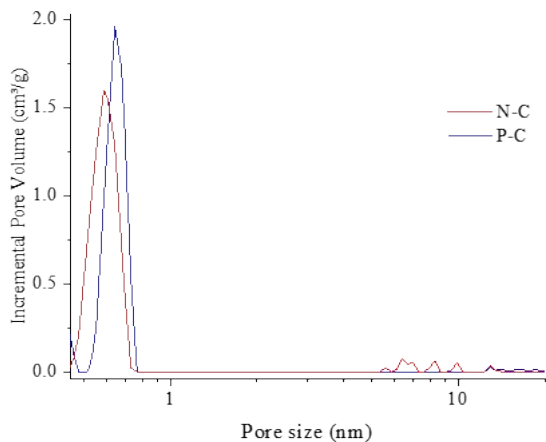

Fig. S2 Pore size distribution curves of N-C (red) and P-C (blue).

## Thermogravimetric analyses (TGA)

**Table S2** Weight loss and template molecules per cages of N-AS and P-AS.

| Sample | Weight loss (wt%) |      |     | Molecules per cage |
|--------|-------------------|------|-----|--------------------|
|        | I                 | II   | III |                    |
| N-AS   | 4                 | 10.0 | 2.9 | 1.6                |
| P-AS   | 2                 | 12.7 | 3.5 | 1.2                |

## FT-IR spectroscopy

FT-IR spectra of the -OH region normalized (**Fig. S3 A**) and the evolution of the -OH region during CD<sub>3</sub>CN adsorption is shown in **Fig. S3 B**.

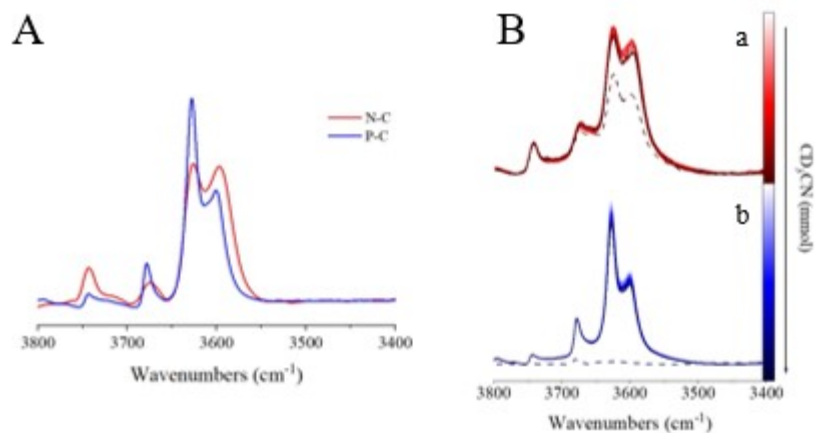

Fig. S3 (A) FT-IR spectra of the OH-stretching region and (B) evolution of the -OH region during CD<sub>3</sub>CN adsorption of N-C (a, red) and P-C (b, blue).

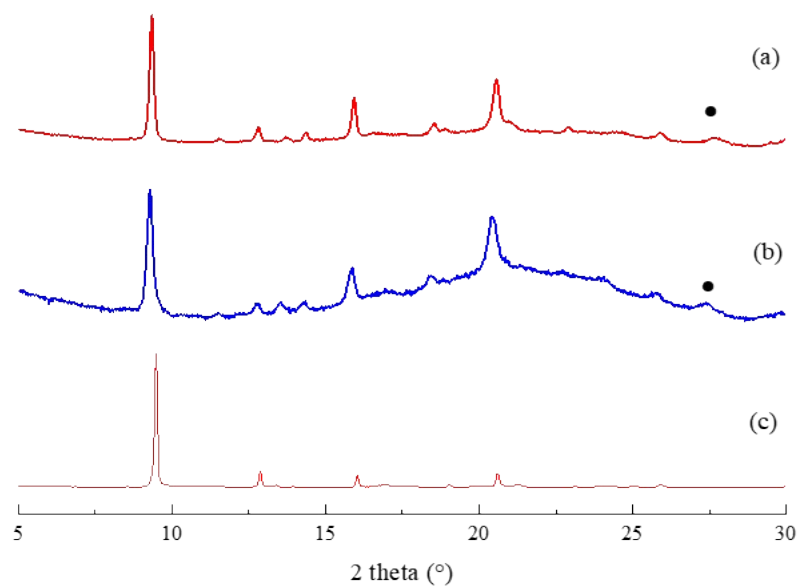

Fig. S4 XRD pattern after MTO reaction of N-C (a, red) and P-C (b, blue). Comparison with the fresh sample N-C (c). ● carbonaceous species.
